# Supplementary material for: High performance and self-powered photodetectors based on Se/CsPbBr3 heterojunctions
Source: Royal Society of Chemistry journal article supplement (doi:10.1039/d2tc05316k), 2023-01-01
Supplement: d2tc05316k1.pdf [file d2tc05316k1.pdf]

Electronic Supplementary Material (ESI) for Journal of Materials Chemistry C. This journal is © The Royal Society of Chemistry 2022

## Supporting Information

### High performance and Self-Powered Photodetector Based on Se/CsPbBr<sub>3</sub> Heterojunction

Tianxu Zheng,<sup>a</sup> Qingyang Du,<sup>a</sup> Weiwei Wang,<sup>a</sup> Wei Duan,<sup>a</sup> Shiliang Feng,<sup>a</sup> Rongpeng Chen,<sup>a</sup> Xi Wan,

<sup>a</sup>Yanfeng Jiang <sup>a</sup> and Pingping Yu <sup>\*a</sup>

a. Engineering Research Center of IoT Technology Applications (Ministry of Education),  
Department of Electronic Engineering, Institute of Advanced Technology, Jiangnan University,  
1800 Lihu Avenue, Wuxi 214122, China.

\* Corresponding Authors.

E-mail: pingpingyu@jiangnan.edu.cn

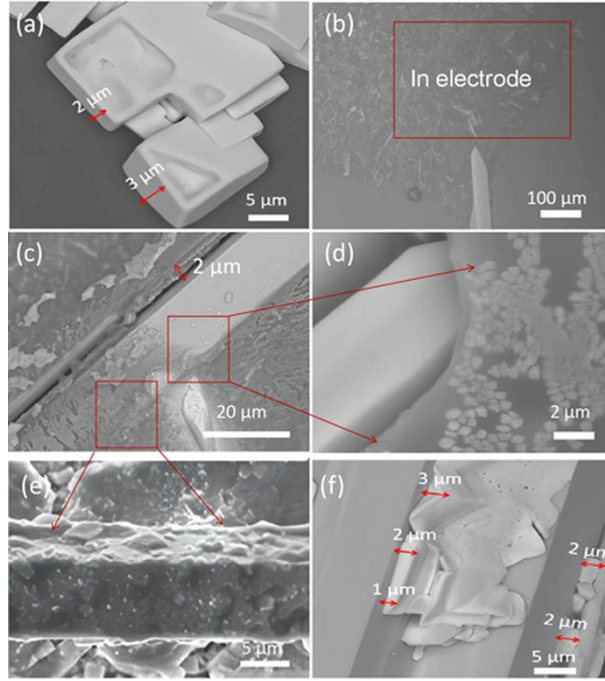

Fig. S1 SEM images of (a) CsPbBr<sub>3</sub> and (b-f) Se/CsPbBr<sub>3</sub> at low and high magnification.

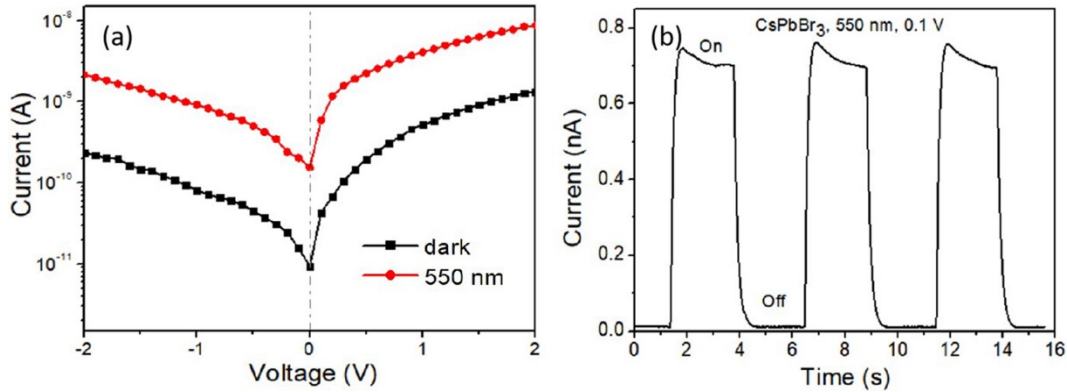

Fig. S2 (a) The I-V curves of CsPbBr<sub>3</sub> PD at dark and 550 nm, (b) I-t curves of CsPbBr<sub>3</sub> PD under 550 nm at 0.1 V bias.

In order to calculate the noise equivalent power (NEP) of the Se/CsPbBr<sub>3</sub> device, we measured the noise current of our detectors under a bias of 0.5, 1 and 2 V at different frequency (1-1000 Hz). The noise power spectrum is shown on Fig. S3. With a slope of approximately 1, the noise power spectrum of Se/CsPbBr<sub>3</sub> PD exhibits high 1/f dependency, which mostly restricts detectivity at low-frequency because of the flicker noise. At 1 Hz,  $S(f = 1\text{Hz})$  is  $9.34 \times 10^{-28}$ ,  $2.97 \times 10^{-26}$ ,  $1.24 \times 10^{-25}$  A<sup>2</sup> Hz<sup>-1</sup> at bias of 0.5, 1 and 2 V. The responsivity of Se/CsPbBr<sub>3</sub> PD is 0.8, 1.2 and 3.2 AW<sup>-1</sup> with the different bias at 550 nm, respectively. Then, the NEP of Se/CsPbBr<sub>3</sub> PD is calculated to be  $1.21 \times 10^{-13}$ ,  $1.43 \times 10^{-13}$  and  $1.12 \times 10^{-13}$  W Hz<sup>-1/2</sup> at the wavelength of 550 nm under a modulation frequency of 1 Hz at bias of 0.5, 1 and 2 V, which is lower sensitivity than the reported photodetectors (PbS/CsPbBr<sub>3</sub> PD of 0.14 pW Hz<sup>-1/2</sup>, CsPbBr<sub>3</sub> PD of 1 pW Hz<sup>-1/2</sup>, MoS<sub>2</sub> PD of 1.8 pW Hz<sup>-1/2</sup>)<sup>55-57</sup>. According to the equation:  $D^* = \frac{R\sqrt{AB}}{I_n} = \frac{\sqrt{AB}}{NEP}$ , where  $I_n$  is the total noise current, A is the effective area of device, B is the measurement bandwidth. The specific detectivity  $D^*$  is

2.61, 2.21 and  $2.90 \times 10^{10}$  Jones at bias of 0.5, 1 and 2 V. The parameter are listed in Table S1 and S2.

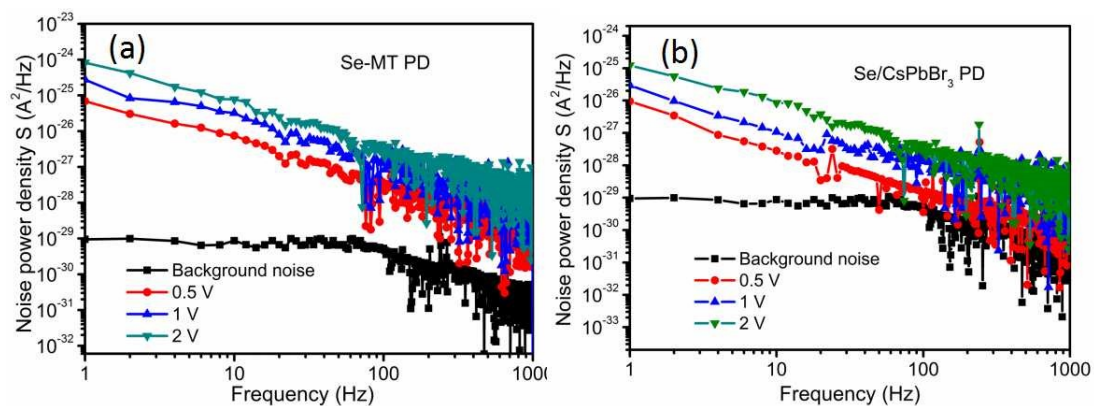

Fig. S3 Noise power density as a function of bias voltage of (a) Se-MT PD and (b) Se/CsPbBr<sub>3</sub> PD.

Table S1 The S(1 Hz), NEP and D\* of Se-MT PD at 0.5, 1 and 2 V

| Bias  | S(1 Hz) (A <sup>2</sup> Hz <sup>-1</sup> ) | R(A W <sup>-1</sup> ) | NEP (W Hz <sup>-1/2</sup> ) | D* (Jones)         |
|-------|--------------------------------------------|-----------------------|-----------------------------|--------------------|
| 0.5 V | $8.26 \times 10^{-26}$                     | 0.1                   | $2.87 \times 10^{-12}$      | $1.10 \times 10^9$ |
| 1 V   | $3.10 \times 10^{-25}$                     | 0.6                   | $9.27 \times 10^{-13}$      | $3.41 \times 10^9$ |
| 2 V   | $9.32 \times 10^{-25}$                     | 1.2                   | $8.05 \times 10^{-13}$      | $3.93 \times 10^9$ |

Table S2 The S(1 Hz), NEP and D\* of Se/CsPbBr<sub>3</sub> PD at 0.5, 1 and 2 V

| Bias  | S(1 Hz) (A <sup>2</sup> Hz <sup>-1</sup> ) | R(A W <sup>-1</sup> ) | NEP (W Hz <sup>-1/2</sup> ) | D* (Jones)            |
|-------|--------------------------------------------|-----------------------|-----------------------------|-----------------------|
| 0.5 V | $9.34 \times 10^{-28}$                     | 0.8                   | $1.21 \times 10^{-13}$      | $2.61 \times 10^{10}$ |
| 1 V   | $2.97 \times 10^{-26}$                     | 1.2                   | $1.43 \times 10^{-13}$      | $2.21 \times 10^{10}$ |
| 2 V   | $1.24 \times 10^{-25}$                     | 3.2                   | $1.12 \times 10^{-13}$      | $2.90 \times 10^{10}$ |

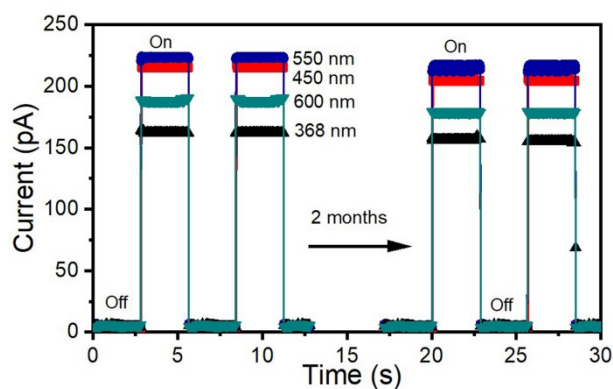

Fig. S4 The I-t curves of the Se/CsPbBr<sub>3</sub> PD after 2 months.
